# Supplementary material
Source: MDPI journal article supplement (https://www.mdpi.com/2297-8739/11/4/125)
Supplement: s1 [file s1]

**Adsorption of Fluoride from Water using Aluminum Coated Silica Adsorbents:  
Comparison of Silica Sand and Microcrystalline Silica**

Kiana Modaresahmadi, Amid P. Khodadoust\*, and James Wescott

Department of Civil, Materials, and Environmental Engineering

University of Illinois Chicago,

Chicago, Illinois, USA

**Supplementary Material**

(Coupled TwoTheta/Theta)

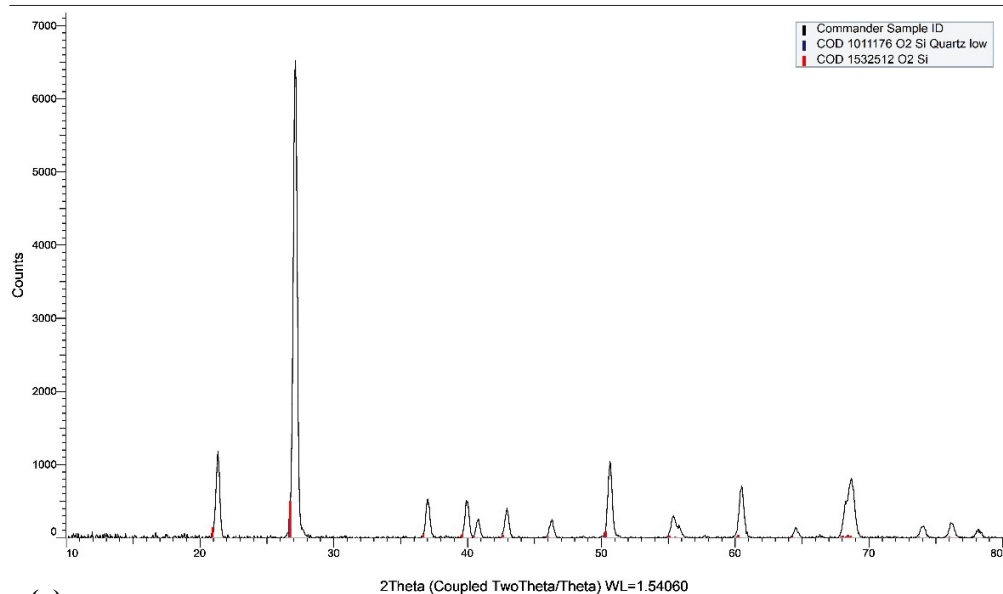

(a)

(Coupled TwoTheta/Theta)

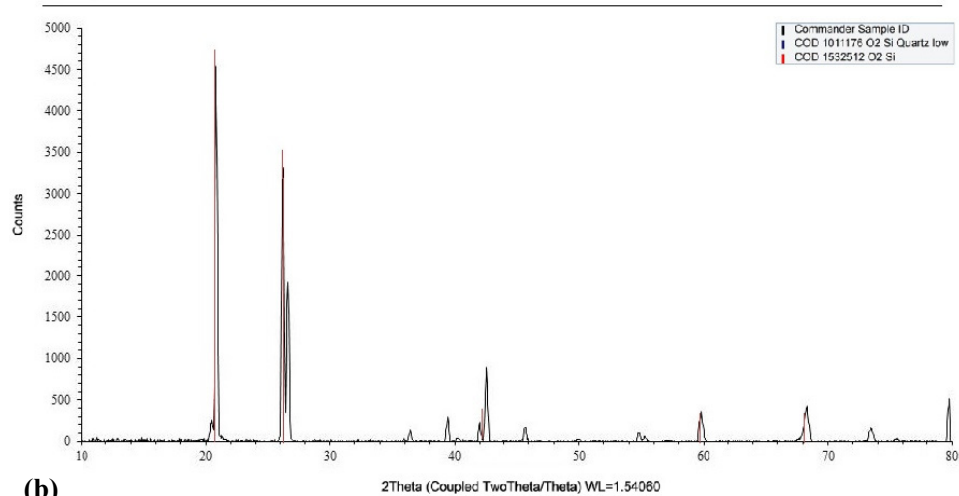

(b)

**Figure S1.** XRD patterns of (a) Microcrystalline Silica and (b) Silica Sand.

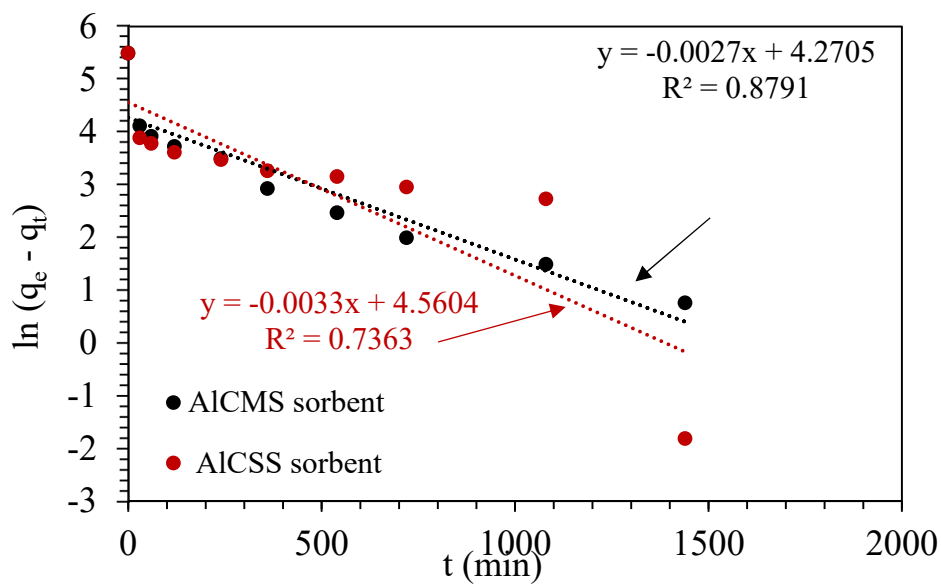

(a)

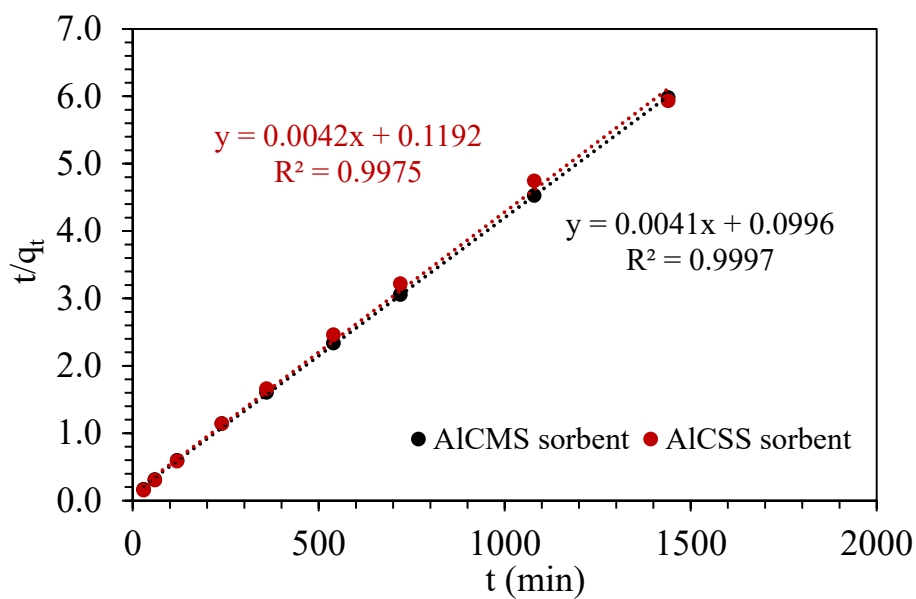

(b)

**Figure S2.** (a) Pseudo-first-order kinetics plot for fluoride adsorption by the AICSS and AICMS sorbents using an initial fluoride concentration of 5 mg/L and an adsorbent dosage of 20 g/L; (b) Pseudo-second-order kinetics plot for fluoride adsorption by the AICSS and AICMS sorbents using an initial fluoride concentration of 5 mg/L and an adsorbent dosage of 20 g/L.

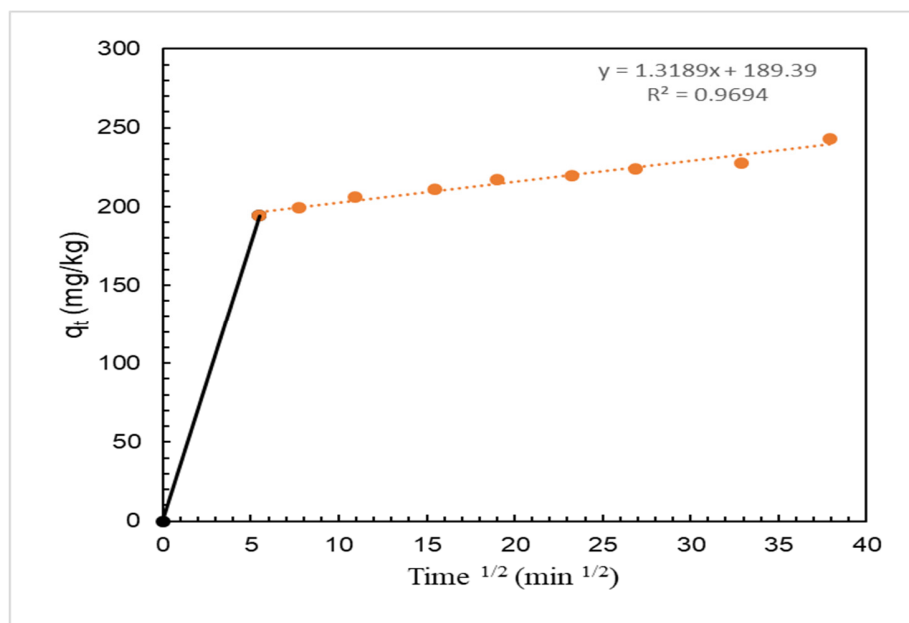

(A)

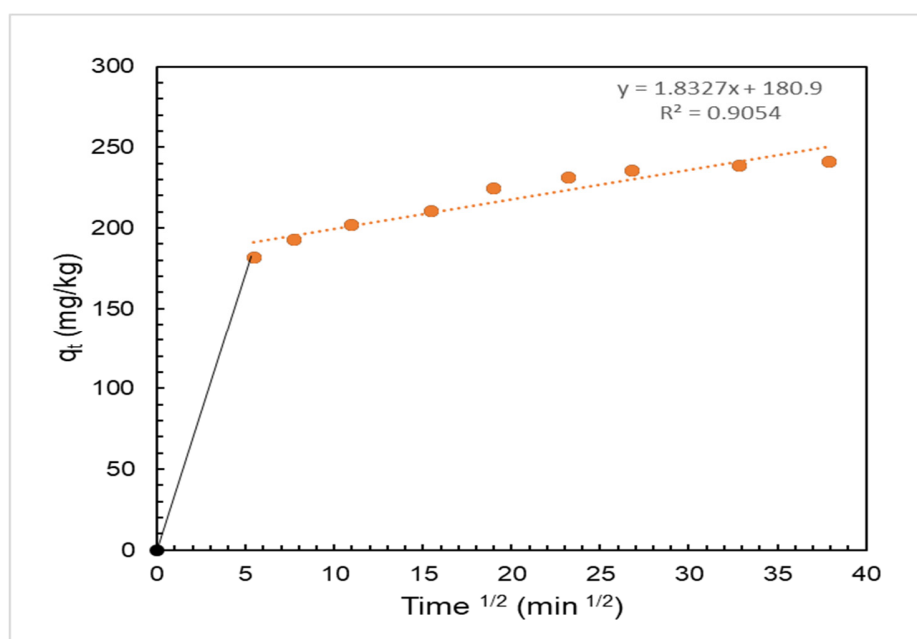

(B)

**Figure S3.** (a) Intraparticle diffusion plot for AICSS sorbent, (b) Intraparticle diffusion plot for AICMS sorbent.

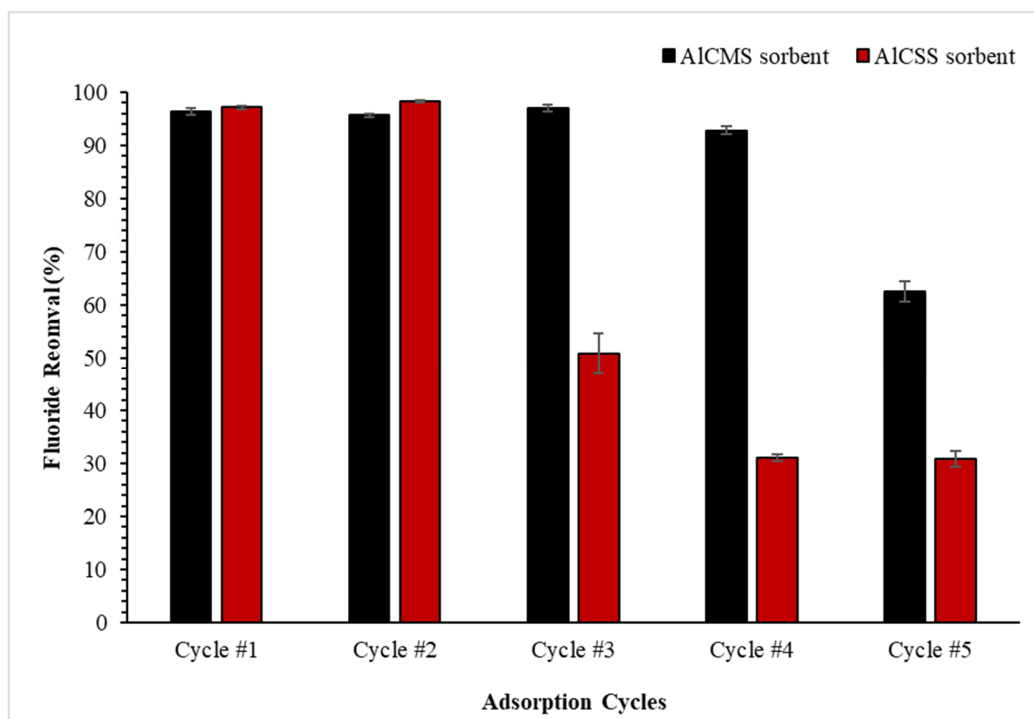

**Figure S4.** Successive adsorption cycles study using 20 g/L of AICSS and AICMS sorbents with 5 mg/L initial fluoride concentration for 24 hour adsorption cycles.
